# Supplementary material for: Using Telomeric Length Measurements and Methylation to Understand The Karyotype Diversification of Ctenomys Minutus (A Small Fossorial Mammals)
Source: Research Square preprint supplement (doi:10.21203/rs.3.rs-1026297/v1), 2021-11-10

**USING TELOMERIC LENGTH MEASUREMENTS AND METHYLATION TO UNDERSTAND THE KARYOTYPE DIVERSIFICATION OF *CTENOMYS MINUTUS* (A SMALL FOSSORIAL MAMMALS)**

**Cristina A. Matzenbacher,**

**Juliana da Silva,**

**Ana Letícia H. Garcia,**

**Rafael Kretschmer,**

**Mónica Cappetta,**

**Edivaldo H. Correa de Oliveira,**

**Thales R. O. de Freitas**

**SUPPLEMENTARY INFORMATION**

The telomere standard curve (Tel STD) was used to measure the telomeric content per sample in kilobases (kb). The cycle threshold (Ct) of the telomere qPCRs ranged from 7 to 13, and all target samples were within the standard linear range. The 36B4 STD curve was used to measure the number of diploid genome copies per sample.

Figure S1. A. Standard curves used to calculate TL. The log of kb of telomere standard oligomer DNA. B. Standard curves used to calculate TL. The log of kb of 36B4 standard oligomer DNA.


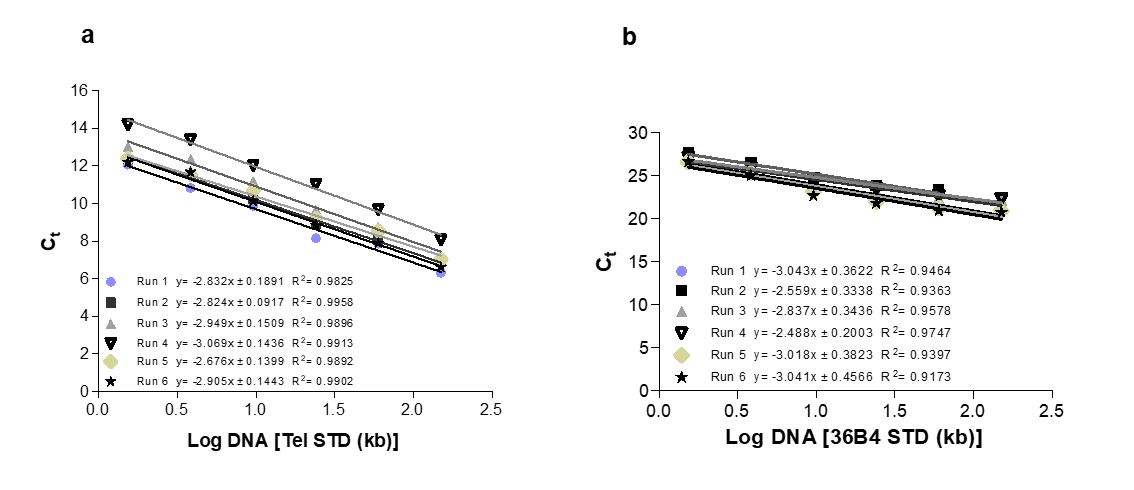

Supplement: Supplementary file 1 [file f1f80b6d95ceab61244487ea.docx]
